# Supplementary material for: Thoracic Aortic Calcification and Pre-Clinical Hypertension by New 2017 ACC/AHA Hypertension Guidelines
Source: MDPI journal article supplement (doi:10.3390/diagnostics11061027), 2021-06-03
Supplement: s1 [file s1]

**(Supplemental Materials)**

**Supplemental Table S1. Sensitivity analysis exploring the probability of TAC and CAC existence by backward stepwise uni- and multi-variate regression models in subjects without known CVD or ongoing HTN medication use**

| <b>Logistic regression (<i>Total n = 2,784</i>)</b> | <b>Uni-variate</b> |         | <b>Multi-variate</b> |         |
|-----------------------------------------------------|--------------------|---------|----------------------|---------|
| <b>ACC/AHA 2017 HTN Guideline<sup>2</sup></b>       | <b>Odds ratio</b>  |         | <b>Odds ratio</b>    |         |
| <b>Thoracic Aortic Calcium</b>                      | OR (95% CI)        | P value | OR (95% CI)          | P value |
| Age (>50 years)                                     | 7.98 (6.03-10.56)  | <0.001  | 7.24 (5.35-9.79)     | <0.001  |
| Sex (Male)                                          | 0.86 (0.69-1.06)   | 0.15    | —                    | NS      |
| BMI (>25 kg/m <sup>2</sup> )                        | 1.24 (1.00-1.55)   | 0.05    | —                    | NS      |
| Body Fat (M>23%, F>25%) <sup>12</sup>               | 1.19 (0.94-1.50)   | NS      | —                    | NS      |
| HTN (Stage 1+2)                                     | 3.24 (2.60-4.04)   | <0.001  | 2.51 (1.94-3.24)     | <0.001  |
| Diabetes                                            | 3.49 (2.31-5.27)   | <0.001  | 1.93 (1.19-3.14)     | 0.001   |
| Dyslipidemia                                        | 1.40 (0.79-2.48)   | 0.25    | —                    | NS      |
| Smoking                                             | 1.12 (0.96-1.31)   | 0.15    | —                    | NS      |
| <b>Coronary Artery Calcium</b>                      |                    |         |                      |         |
| Age (>50 y/o)                                       | 3.96 (3.31-4.74)   | <0.001  | 4.15 (3.39-5.08)     | <0.001  |
| Sex (Male)                                          | 2.48 (2.00-3.07)   | <0.001  | 2.76 (2.02-3.77)     | <0.001  |
| BMI (>25 kg/m <sup>2</sup> )                        | 1.92 (1.62-2.27)   | <0.001  | 1.55 (1.21-1.99)     | 0.001   |
| Body Fat (M>23%, F>25%)                             | 1.10 (0.92-1.32)   | 0.31    | —                    | NS      |
| HTN (Stage 1+2)                                     | 2.66 (2.24-3.17)   | <0.001  | 1.95 (1.60-2.39)     | <0.001  |
| Diabetes                                            | 2.80 (1.89-4.13)   | <0.001  | 1.65 (1.05-2.61)     | 0.031   |
| Dyslipidemia                                        | 1.00 (0.61-1.63)   | 0.99    | —                    | NS      |
| Smoking                                             | 1.20 (1.06-1.36)   | 0.003   | —                    | NS      |

**Supplemental Table S2. Sensitivity analysis exploring adjusted estimates of TAC burden across HTN stages/grades using different clinical guidelines in subjects without known CVD or ongoing HTN medication use**

| <b>ACC/AHA 2017 HTN Guideline<sup>2</sup></b>  |         |              |               |                               |                  |
|------------------------------------------------|---------|--------------|---------------|-------------------------------|------------------|
| <i>(Sensitivity Analysis, n=2,784)</i>         |         |              |               |                               |                  |
| BP Category (mmHg)                             | SBP     | DBP          | TAC Score     | TAC Volume (mm <sup>3</sup> ) | TAC Density (HU) |
| Normal (NBP)                                   | < 120   | and <80      | 28.0±12.8     | 26.0±10.5                     | 24.5±2.56        |
| Elevated (EBP)                                 | 120-129 | and <80      | 37.0±17.7*    | 31.3±14.4*                    | 35.1±3.53*       |
| Stage 1 HTN                                    | 130-139 | or 80-89     | 32.4±22.1     | 27.2±18.0                     | 45.1±4.41*#      |
| Stage 2 HTN                                    | ≥ 140   | or ≥ 90      | 138.9±18.8*#† | 114.8±15.6*#†                 | 59.7±3.76*#†     |
| <b>ESC/ESH 2013 HTN Guideline<sup>13</sup></b> |         |              |               |                               |                  |
| <i>(Sensitivity Analysis, n=2,784)</i>         |         |              |               |                               |                  |
| BP Category (mmHg)                             | SBP     | DBP          | TAC Score     | TAC Volume (mm <sup>3</sup> ) | TAC Density (HU) |
| Normal (NBP)                                   | < 130   | and < 85     | 32.6±10.7     | 29.0±8.73                     | 29.8±2.15        |
| High Normal (HNBP)                             | 130-139 | and/or 85-89 | 38.4±21.0*    | 32.2±17.1*                    | 43.2±4.20*       |
| Grade 1 HTN                                    | 140-159 | and/or 90-99 | 151.1±21.4*#  | 124.6±17.5*#                  | 51.7±4.30*#      |
| Grade 2 HTN*                                   | ≥ 160   | and/or ≥ 100 | 81.1±39.4*#†  | 68.9±32.1*#†                  | 65.0±7.90*#†     |
